# Supplementary material
Source: publisher figshare collection journal article supplement (https://tandf.figshare.com/ndownloader/files/16346612)

**Fabrication of nanogranular TiO2 thin films by SILAR technique: Application for NO2 gas sensor**

**V. L. Patila, S. A. Vanalakara*, S. S. Shendageb , S. P. Patilb , A. S. Kamblec,**

**N. L. Tarwalb, K. K. Sharmad , J. H. Kimc*, P. S. Patilb***

a*Dept. of Physics, Karmveer Hire Arts, Science, Commerce and Education College, Gargoti, Tal-Bhudargad, Dist-Kolhapur, India*

*bThin Film Materials Laboratory, Department of Physics, Shivaji University, Kolhapur, India*

*cDepartment of Materials Science, Chonnam National University, Gwangju, Republic of Korea*

*dSchool of Nanoscience and Technology, Shivaji University, Kolhapur, India*

Supporting Information

**Fig. S1:** The gas sensing experimental set-up to study the gas sensing performance of TiO2 thin films. The second figure shows the experimental set-up of two-probe method to study the electrical properties of TiO2 thin films.


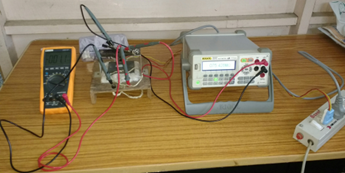

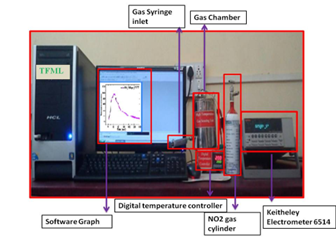

Supplement: Supplementary file 1 [file 16346612]
